# Supplementary material for: Dissecting the Roles of Phosphorus Use Efficiency, Organic Acid Anions, and Aluminum-Responsive Genes under Aluminum Toxicity and Phosphorus Deficiency in Ryegrass Plants
Source: MDPI journal article supplement (doi:10.3390/plants13070929), 2024-03-23
Supplement: s1 [file s1]

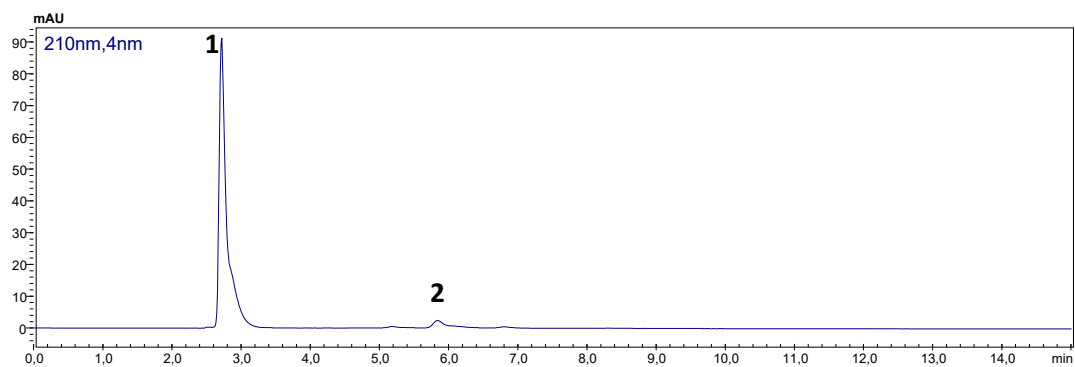

**Figure S1.** HPLC-DAD chromatogram (210 nm) of organic acids, (1); Oxalic acid and (2); Citric acid in ryegrass plants growing under different P-Al treatments
